# Supplementary material
Source: PubMed Central journal article supplement (PMC6233775)
Supplement: jamaoncol-4-e181114-s001.pdf [file jamaoncol-4-e181114-s001.pdf]

## Supplementary Online Content

Venigalla S, Carmona R, Guttman DM, et al. Use and effectiveness of adjuvant endocrine therapy for hormone receptor–positive breast cancer in men. *JAMA Oncol*. Published online May 24, 2018. doi:10.1001/jamaoncol.2018.1114

**eFigure 1.** Consolidated Standards of Reporting Trials (CONSORT) Diagram

**eFigure 2a.** Percentage of Patients Receiving Adjuvant Endocrine Therapy by Year (*P* for trend < .001)

**eFigure 2b.** Hospital-Level Guideline Concordance of Adjuvant Endocrine Therapy by Year (*P* for trend < .001)

**eFigure 3.** Subgroup Analyses of Overall Survival

**eTable 1.** Baseline Characteristics, Male Cohort (Complete Table)

**eTable 2.** Baseline Characteristics, Male vs Female Cohorts

**eTable 3.** Factors Associated With Receipt of Adjuvant Endocrine Therapy

**eTable 4.** Factors Associated With Overall Survival (Complete Table)

This supplementary material has been provided by the authors to give readers additional information about their work.

eFigure 1. Consolidated Standards of Reporting Trials (CONSORT) Diagram.

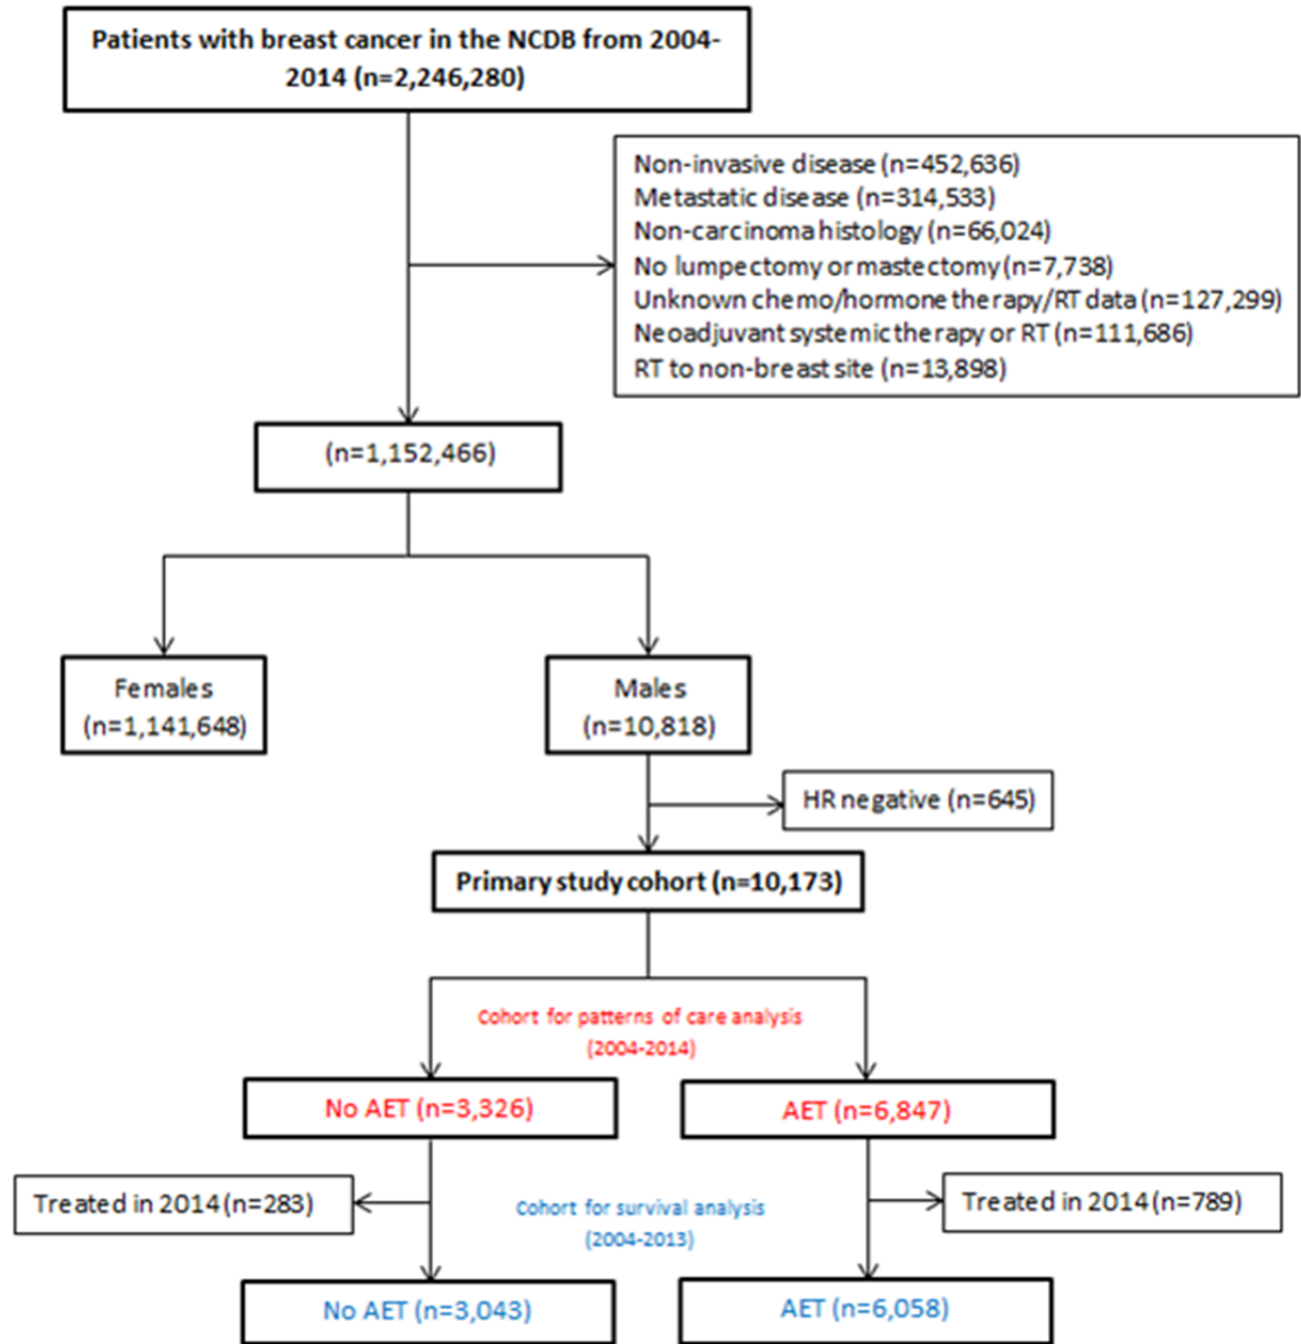

AET: Adjuvant endocrine therapy; RT: Radiotherapy.

**eFigure 2a. Percentage of Patients Receiving Adjuvant Endocrine Therapy by Year (*P* for trend < .001)**

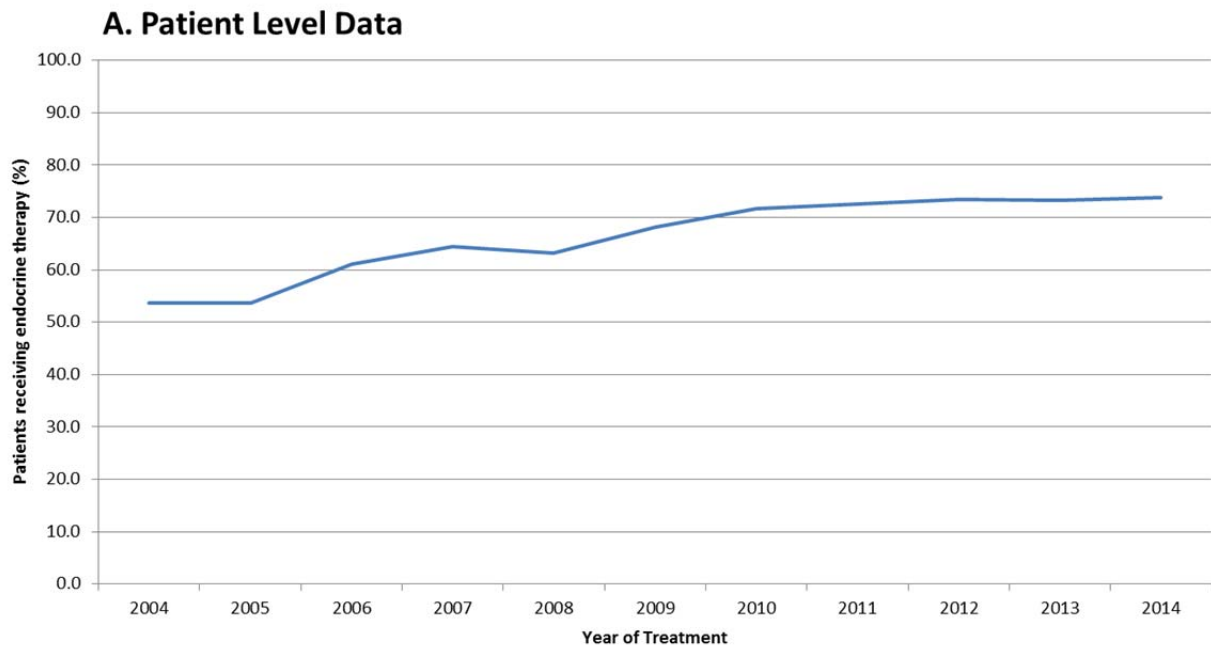

**eFigure 2b. Hospital-Level Guideline Concordance of Adjuvant Endocrine Therapy by Year (*P* for trend < .001)**

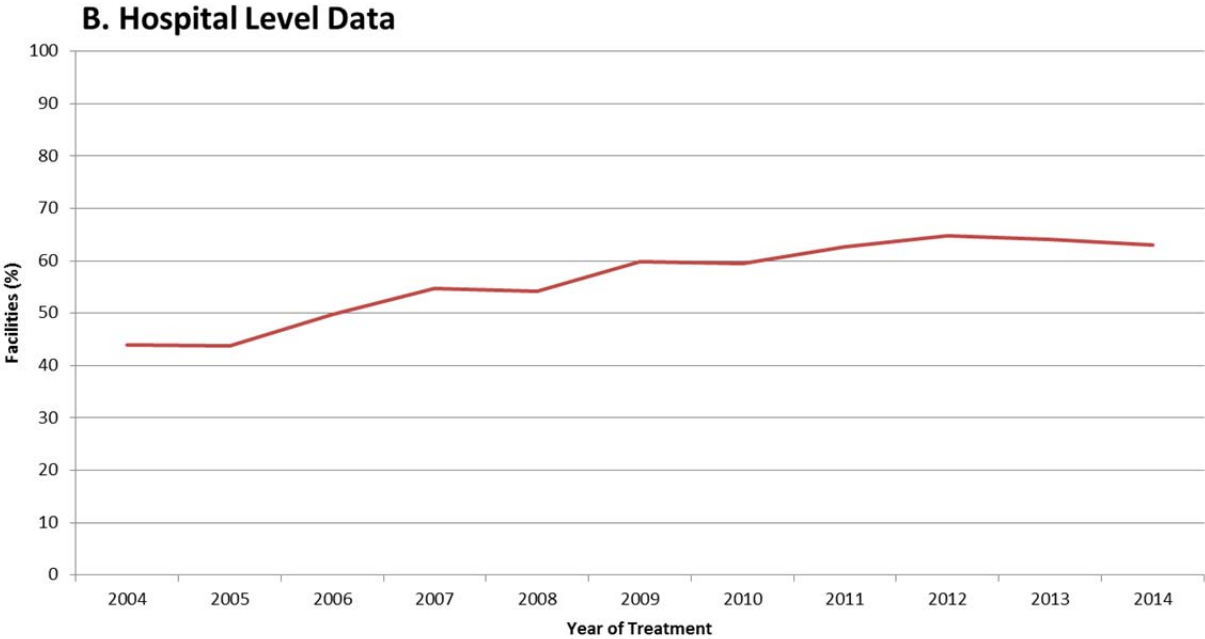

### eFigure 3. Subgroup Analyses of Overall Survival

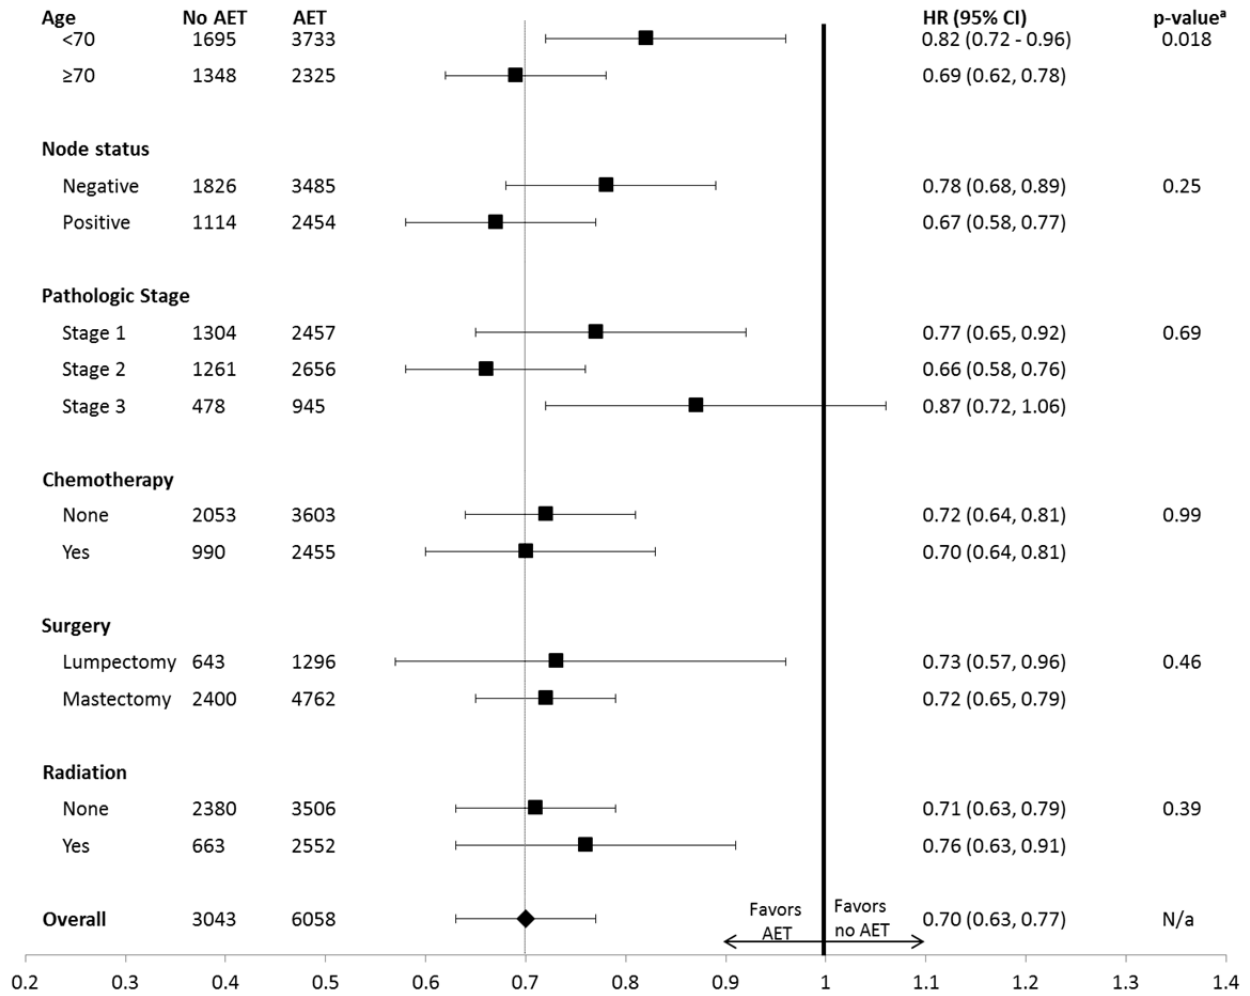

Dashed line represents overall hazard ratio. *AET*: Adjuvant endocrine therapy; *HR*: Hazard ratio; <sup>a</sup>p-value denotes test for interaction.

| eTable 1. Baseline Characteristics, Male Cohort (Complete Table) |            |    |         |    |           |     |          |
|------------------------------------------------------------------|------------|----|---------|----|-----------|-----|----------|
|                                                                  | No AET (%) |    | AET (%) |    | Total (%) |     | p (chi2) |
| <b>Total no.</b>                                                 | 3,326      | 33 | 6,847   | 67 | 10,173    | 100 |          |
| <b>Age (years)</b>                                               |            |    |         |    |           |     | <0.001   |
| 18-49                                                            | 379        | 11 | 795     | 12 | 1,174     | 12  |          |
| 50-69                                                            | 1,487      | 45 | 3,401   | 50 | 4,888     | 48  |          |
| 70+                                                              | 1,460      | 44 | 2,651   | 39 | 4,111     | 40  |          |
| <b>Race</b>                                                      |            |    |         |    |           |     | 0.003    |
| Non-Hispanic White                                               | 2,694      | 81 | 5,737   | 84 | 8,431     | 83  |          |
| Non-Hispanic Black                                               | 380        | 11 | 704     | 10 | 1084      | 11  |          |
| Hispanic                                                         | 117        | 4  | 185     | 3  | 302       | 3   |          |
| Other                                                            | 135        | 4  | 221     | 3  | 356       | 3   |          |
| <b>Location</b>                                                  |            |    |         |    |           |     | <0.001   |
| East                                                             | 570        | 17 | 1626    | 24 | 2196      | 22  |          |
| South                                                            | 1,376      | 41 | 2133    | 31 | 3,509     | 34  |          |
| Central                                                          | 757        | 23 | 1971    | 29 | 2,728     | 27  |          |
| West                                                             | 548        | 16 | 980     | 14 | 1,528     | 15  |          |
| Unknown                                                          | 75         | 2  | 137     | 2  | 212       | 2   |          |
| <b>County size</b>                                               |            |    |         |    |           |     | <0.001   |
| Metropolitan                                                     | 2,840      | 85 | 5,695   | 83 | 8,535     | 84  |          |
| Urban                                                            | 319        | 10 | 871     | 13 | 1,190     | 12  |          |
| Rural                                                            | 38         | 1  | 92      | 1  | 130       | 1   |          |
| Unknown                                                          | 129        | 4  | 189     | 3  | 318       | 3   |          |
| <b>Facility type</b>                                             |            |    |         |    |           |     | 0.001    |
| Non-Academic                                                     | 2,400      | 72 | 4712    | 69 | 7,112     | 70  |          |
| Academic                                                         | 851        | 26 | 1,998   | 29 | 2,849     | 28  |          |
| Unknown                                                          | 75         | 2  | 137     | 2  | 212       | 2   |          |
| <b>Distance to Treatment</b>                                     |            |    |         |    |           |     | 0.001    |
| ≤30 miles                                                        | 2,899      | 87 | 5,916   | 86 | 8,815     | 87  |          |
| >30 miles                                                        | 383        | 12 | 882     | 13 | 1,265     | 12  |          |
| Unknown                                                          | 44         | 1  | 49      | 1  | 93        | 1   |          |
| <b>Insurance Status</b>                                          |            |    |         |    |           |     | 0.15     |
| Commercial Insurance                                             | 1378       | 41 | 2962    | 43 | 4,340     | 43  |          |
| Medicare                                                         | 1679       | 50 | 3389    | 49 | 5,068     | 50  |          |
| Medicaid                                                         | 107        | 3  | 223     | 3  | 330       | 3   |          |
| Uninsured                                                        | 71         | 2  | 111     | 2  | 182       | 2   |          |
| Other/Unknown                                                    | 91         | 3  | 162     | 2  | 253       | 2   |          |

|                                        |       |    |       |    |       |    |        |
|----------------------------------------|-------|----|-------|----|-------|----|--------|
| <b>Education<sup>a</sup></b>           |       |    |       |    |       |    | <0.001 |
| ≥21%                                   | 514   | 15 | 799   | 12 | 1,313 | 13 |        |
| 13%-20.9%                              | 766   | 23 | 1565  | 23 | 2,331 | 23 |        |
| 7%-12.9%                               | 1,080 | 32 | 2369  | 35 | 3,449 | 34 |        |
| <7%                                    | 922   | 28 | 2,063 | 30 | 2,985 | 29 |        |
| Unknown                                | 44    | 1  | 51    | 1  | 95    | 1  |        |
| <b>Income (\$)</b>                     |       |    |       |    |       |    | 0.004  |
| <38,000                                | 529   | 16 | 954   | 14 | 1483  | 15 |        |
| 38,000-47,999                          | 696   | 21 | 1457  | 21 | 2,153 | 21 |        |
| 48,000-62,999                          | 839   | 25 | 1,827 | 27 | 2,666 | 26 |        |
| >63,000                                | 1,217 | 37 | 2,554 | 37 | 3,771 | 37 |        |
| Unknown                                | 45    | 1  | 55    | 1  | 100   | 1  |        |
| <b>Charlson/Deyo Comorbidity Score</b> |       |    |       |    |       |    | 0.28   |
| 0                                      | 2,571 | 77 | 5,364 | 78 | 7,935 | 78 |        |
| 1                                      | 569   | 17 | 1147  | 17 | 1,716 | 17 |        |
| 2                                      | 186   | 6  | 336   | 5  | 522   | 5  |        |
| <b>Laterality</b>                      |       |    |       |    |       |    | 0.70   |
| Right                                  | 1581  | 48 | 3195  | 47 | 4776  | 47 |        |
| Left                                   | 1742  | 52 | 3645  | 53 | 5387  | 53 |        |
| Unknown                                | 3     | 0  | 7     | 0  | 10    | 0  |        |
| <b>Histology</b>                       |       |    |       |    |       |    | 0.27   |
| Invasive ductal carcinoma              | 2986  | 90 | 6171  | 90 | 9157  | 90 |        |
| Invasive lobular carcinoma             | 191   | 6  | 413   | 6  | 604   | 6  |        |
| Adenocarcinoma NOS                     | 149   | 4  | 263   | 4  | 412   | 4  |        |
| <b>Size</b>                            |       |    |       |    |       |    |        |
| ≤2cm                                   | 1,841 | 55 | 3,816 | 56 | 5,657 | 56 | 0.30   |
| 2.1-5cm                                | 1,359 | 41 | 2,816 | 41 | 4,175 | 41 |        |
| >5cm                                   | 108   | 3  | 191   | 3  | 299   | 3  |        |
| Unknown                                | 18    | 1  | 24    | 0  | 42    | 0  |        |
| <b>Grade</b>                           |       |    |       |    |       |    | 0.024  |
| 1                                      | 511   | 15 | 1,087 | 16 | 1,598 | 16 |        |
| 2                                      | 1,651 | 50 | 3,477 | 51 | 5,128 | 50 |        |
| 3                                      | 982   | 30 | 1,998 | 29 | 2,980 | 29 |        |
| Unknown                                | 182   | 5  | 285   | 4  | 467   | 5  |        |
| <b>Node status</b>                     |       |    |       |    |       |    | <0.001 |
| Negative                               | 1981  | 60 | 3945  | 58 | 5926  | 58 |        |
| Positive                               | 1,233 | 37 | 2766  | 40 | 3,999 | 39 |        |
| Unknown                                | 112   | 3  | 136   | 2  | 248   | 2  |        |

|                         |       |    |       |    |       |    |        |
|-------------------------|-------|----|-------|----|-------|----|--------|
| <b>Pathologic Stage</b> |       |    |       |    |       |    | 0.009  |
| Stage 1                 | 1,421 | 43 | 2756  | 40 | 4177  | 41 |        |
| Stage 2                 | 1371  | 41 | 3041  | 44 | 4412  | 43 |        |
| Stage 3                 | 534   | 16 | 1050  | 15 | 1584  | 16 |        |
| <b>Type of Surgery</b>  |       |    |       |    |       |    | 0.61   |
| Lumpectomy              | 693   | 21 | 1,457 | 21 | 2,150 | 21 |        |
| Mastectomy              | 2,633 | 79 | 5,390 | 79 | 8,023 | 79 |        |
| <b>Surgical Margins</b> |       |    |       |    |       |    | 0.065  |
| No Residual disease     | 3,165 | 95 | 6579  | 96 | 9,744 | 96 |        |
| Residual disease        | 128   | 4  | 204   | 3  | 332   | 3  |        |
| Unknown                 | 33    | 1  | 64    | 1  | 97    | 1  |        |
| <b>Chemotherapy</b>     |       |    |       |    |       |    | <0.001 |
| No                      | 2,237 | 67 | 4,141 | 60 | 6,378 | 63 |        |
| Yes                     | 1,089 | 33 | 2,706 | 40 | 3,795 | 37 |        |
| <b>Radiotherapy</b>     |       |    |       |    |       |    | <0.001 |
| None                    | 2,607 | 78 | 3984  | 58 | 6,591 | 65 |        |
| Yes                     | 719   | 22 | 2863  | 42 | 3,582 | 35 |        |

Abbreviation: *AET*: Adjuvant endocrine therapy.

<sup>a</sup>% population in the patient's zip code without a high school degree.



| eTable 2. Baseline Characteristics, Male vs Female Cohorts         |        |    |           |    |           |    |          |
|--------------------------------------------------------------------|--------|----|-----------|----|-----------|----|----------|
|                                                                    | Male   |    | Female    |    | Total     |    | p (chi2) |
| <b>Total no.</b>                                                   | 10,818 | %  | 1,141,648 | %  | 1,152,466 | %  |          |
| <b>Hormone Receptor Status</b>                                     |        |    |           |    |           |    | <0.001   |
| ER- and PR-                                                        | 645    | 6  | 179,972   | 16 | 180,617   | 16 |          |
| ER+ or PR+                                                         | 10,173 | 94 | 961,676   | 84 | 971,849   | 84 |          |
| <b>Receipt of Adjuvant Endocrine Treatment (HR+ patients only)</b> |        |    |           |    |           |    | <0.001   |
| No                                                                 | 3,326  | 33 | 202,061   | 21 | 205,387   | 21 |          |
| Yes                                                                | 6847   | 67 | 759615    | 79 | 766462    | 79 |          |
| <b>Age (years)</b>                                                 |        |    |           |    |           |    | <0.001   |
| 18-49                                                              | 1,326  | 12 | 230,257   | 20 | 231,583   | 20 |          |
| 50-69                                                              | 5,219  | 48 | 583,606   | 51 | 588,825   | 51 |          |
| 70+                                                                | 4,273  | 39 | 327,785   | 29 | 332,058   | 29 |          |
| <b>Race</b>                                                        |        |    |           |    |           |    | <0.001   |
| Non-Hispanic White                                                 | 8,919  | 82 | 931,268   | 82 | 940,187   | 82 |          |
| Non-Hispanic Black                                                 | 1185   | 11 | 109578    | 10 | 110763    | 10 |          |
| Hispanic                                                           | 331    | 3  | 50024     | 4  | 50355     | 4  |          |
| Other                                                              | 383    | 4  | 50778     | 4  | 51161     | 4  |          |
| <b>Facility type</b>                                               |        |    |           |    |           |    | <0.001   |
| Non-Academic                                                       | 7589   | 70 | 779,541   | 68 | 787,130   | 68 |          |
| Academic                                                           | 2,970  | 27 | 316,523   | 28 | 319,493   | 28 |          |
| Unknown                                                            | 259    | 2  | 45,584    | 4  | 45,843    | 4  |          |
| <b>Charlson/Deyo Comorbidity Score</b>                             |        |    |           |    |           |    | <0.001   |
| 0                                                                  | 8,486  | 78 | 962,715   | 84 | 971,201   | 84 |          |
| 1                                                                  | 1791   | 17 | 147,009   | 13 | 148,800   | 13 |          |
| 2                                                                  | 541    | 5  | 31924     | 3  | 32465     | 3  |          |
| <b>Laterality</b>                                                  |        |    |           |    |           |    | <0.001   |
| Right                                                              | 5082   | 47 | 564639    | 49 | 569721    | 49 |          |
| Left                                                               | 5725   | 53 | 576130    | 50 | 581855    | 50 |          |
| Unknown                                                            | 11     | 0  | 879       | 0  | 890       | 0  |          |
| <b>Histology</b>                                                   |        |    |           |    |           |    | <0.001   |
| Invasive ductal carcinoma                                          | 9764   | 90 | 916505    | 80 | 926269    | 80 |          |
| Invasive lobular carcinoma                                         | 618    | 6  | 182081    | 16 | 182699    | 16 |          |
| Adenocarcinoma NOS                                                 | 436    | 4  | 43062     | 4  | 43498     | 4  |          |
| <b>Size</b>                                                        |        |    |           |    |           |    |          |
| ≤2cm                                                               | 6,003  | 55 | 784,454   | 69 | 790,457   | 69 | <0.001   |
| 2.1-5cm                                                            | 4,434  | 41 | 307,459   | 27 | 311,893   | 27 |          |
| >5cm                                                               | 336    | 3  | 44,287    | 4  | 44,623    | 4  |          |

|                         |       |    |           |    |           |    |        |
|-------------------------|-------|----|-----------|----|-----------|----|--------|
| Unknown                 | 45    | 0  | 5448      | 0  | 5493      | 0  |        |
| <b>Grade</b>            |       |    |           |    |           |    | <0.001 |
| 1                       | 1,617 | 15 | 271,467   | 24 | 273,084   | 24 |        |
| 2                       | 5,262 | 49 | 485,646   | 43 | 490,908   | 43 |        |
| 3                       | 3,436 | 32 | 323,161   | 28 | 326,597   | 28 |        |
| Unknown                 | 503   | 5  | 61,374    | 5  | 61,877    | 5  |        |
| <b>Node status</b>      |       |    |           |    |           |    | <0.001 |
| Negative                | 6364  | 59 | 804440    | 70 | 810804    | 70 |        |
| Positive                | 4198  | 39 | 310,208   | 27 | 314,406   | 27 |        |
| Unknown                 | 256   | 2  | 27,000    | 2  | 27,256    | 2  |        |
| <b>Pathologic Stage</b> |       |    |           |    |           |    | <0.001 |
| Stage 1                 | 4455  | 41 | 663,208   | 58 | 667663    | 58 |        |
| Stage 2                 | 4695  | 43 | 373366    | 33 | 378061    | 33 |        |
| Stage 3                 | 1668  | 15 | 105074    | 9  | 106742    | 9  |        |
| <b>Type of Surgery</b>  |       |    |           |    |           |    | <0.001 |
| Lumpectomy              | 2,480 | 23 | 675,629   | 59 | 678,109   | 59 |        |
| Mastectomy              | 8,338 | 77 | 466,019   | 41 | 474,357   | 41 |        |
| <b>Surgical Margins</b> |       |    |           |    |           |    | <0.001 |
| No Residual disease     | 10354 | 96 | 1,084,367 | 95 | 1,094,721 | 95 |        |
| Residual disease        | 363   | 3  | 47,587    | 4  | 47,950    | 4  |        |
| Unknown                 | 101   | 1  | 9,694     | 1  | 9,795     | 1  |        |
| <b>Chemotherapy</b>     |       |    |           |    |           |    | 0.92   |
| No                      | 6,594 | 61 | 695,302   | 61 | 701,896   | 61 |        |
| Yes                     | 4,224 | 39 | 446,346   | 39 | 450,570   | 39 |        |
| <b>Radiotherapy</b>     |       |    |           |    |           |    | <0.001 |
| None                    | 6916  | 64 | 463,719   | 41 | 470,635   | 41 |        |
| Yes                     | 3902  | 36 | 677,929   | 59 | 681,831   | 59 |        |

ER: Estrogen-receptor; PR: Progesterone-receptor; HR: Hormone-receptor.

| <b>eTable 3. Factors Associated With Receipt of Adjuvant Endocrine Therapy</b> |                               |          |
|--------------------------------------------------------------------------------|-------------------------------|----------|
|                                                                                | <b>Multivariable analysis</b> |          |
|                                                                                | <b>OR [95% CI]</b>            | <b>p</b> |
| <b>Age (years)</b>                                                             |                               |          |
| ≤49                                                                            | -                             | -        |
| 50-69                                                                          | 1.10 [0.94, 1.29]             | 0.23     |
| ≥70                                                                            | 0.92 [0.76, 1.10]             | 0.35     |
| <b>Race</b>                                                                    |                               |          |
| Non-Hispanic White                                                             | -                             | -        |
| Non-Hispanic Black                                                             | 0.98 [0.85, 1.14]             | 0.82     |
| Hispanic                                                                       | 0.96 [0.74, 1.24]             | 0.77     |
| Other                                                                          | 0.78 [0.62, 0.99]             | 0.039    |
| <b>County size</b>                                                             |                               |          |
| Metropolitan                                                                   | -                             | -        |
| Urban                                                                          | 1.36 [1.15, 1.59]             | <0.001   |
| Rural                                                                          | 1.42 [0.94, 2.14]             | 0.092    |
| Unknown                                                                        | 0.84 [0.64, 1.10]             | 0.20     |
| <b>Facility Location</b>                                                       |                               |          |
| East                                                                           | -                             | -        |
| South                                                                          | 0.55 [0.49, 0.63]             | <0.001   |
| Central                                                                        | 0.84 [0.73, 0.96]             | 0.013    |
| West                                                                           | 0.65 [0.56, 0.76]             | <0.001   |
| Unknown                                                                        | 0.70 [0.49, 0.98]             | 0.039    |
| <b>Facility type</b>                                                           |                               |          |
| Non-academic                                                                   | -                             | -        |
| Academic                                                                       | 1.13 [1.02, 1.25]             | 0.022    |
| Unknown                                                                        | -                             | -        |
| <b>Distance to Treatment</b>                                                   |                               |          |
| ≤30 miles                                                                      | -                             | -        |
| >30 miles                                                                      | 1.08 [0.93, 1.26]             | 0.32     |
| Unknown                                                                        | 0.51 [0.12, 2.19]             | 0.36     |
| <b>Insurance status</b>                                                        |                               |          |
| Commercial Insurance                                                           | -                             | -        |
| Medicare                                                                       | 1.13 [1.01, 1.27]             | 0.034    |
| Medicaid                                                                       | 0.94 [0.73, 1.22]             | 0.66     |
| Uninsured                                                                      | 0.78 [0.57, 1.08]             | 0.13     |

|                                |                   |        |
|--------------------------------|-------------------|--------|
| Other Government/Unknown       | 0.95 [0.71, 1.26] | 0.70   |
| <b>Education<sup>a</sup></b>   |                   |        |
| ≥21%                           | -                 | -      |
| 13%-20.9%                      | 1.29 [1.10, 1.51] | 0.002  |
| 7%-12.9%                       | 1.36 [1.15, 1.61] | <0.001 |
| <7%                            | 1.49 [1.23, 1.81] | <0.001 |
| Unknown                        | 1.18 [0.14, 9.78] | 0.88   |
| <b>Income (\$)</b>             |                   |        |
| <38,000                        | -                 | -      |
| 38,000-47,999                  | 1.01 [0.86, 1.19] | 0.87   |
| 48,000-62,999                  | 1.02 [0.87, 1.21] | 0.78   |
| >63,000                        | 0.93 [0.77, 1.12] | 0.43   |
| Unknown                        | 2.03 [0.34, 12.2] | 0.44   |
| <b>Lymph node Status</b>       |                   |        |
| Negative                       | -                 | -      |
| Positive                       | 0.93 [0.82, 1.05] | 0.22   |
| Unknown                        | 0.67 [0.51, 0.87] | 0.003  |
| <b>Pathologic Stage</b>        |                   |        |
| Stage I                        | -                 | -      |
| Stage II                       | 1.10 [0.98, 1.23] | 0.11   |
| Stage III                      | 0.73 [0.61, 0.87] | <0.001 |
| <b>Grade</b>                   |                   |        |
| 1                              | -                 | -      |
| 2                              | 1.05 [0.92, 1.19] | 0.48   |
| 3                              | 0.97 [0.84, 1.12] | 0.66   |
| Unknown                        | 0.70 [0.56, 0.88] | 0.002  |
| <b>Surgical Margin Status</b>  |                   |        |
| Negative                       | -                 | -      |
| Positive                       | 0.81 [0.64, 1.03] | 0.086  |
| Unknown                        | 1.17 [0.75, 1.85] | 0.49   |
| <b>Receipt of Radiotherapy</b> |                   |        |
| No                             | -                 | -      |
| Yes                            | 2.83 [2.55, 3.15] | <0.001 |
| <b>Receipt of Chemotherapy</b> |                   |        |
| No                             | -                 | -      |
| Yes                            | 1.20 [1.07, 1.34] | 0.001  |
| <b>Year of Treatment</b>       |                   |        |
| 2004 - 2007                    | -                 | -      |
| 2008 - 2011                    | 1.65 [1.49, 1.83] | <0.001 |

|             |                   |        |
|-------------|-------------------|--------|
| 2012 - 2014 | 2.05 [1.84, 2.29] | <0.001 |
|-------------|-------------------|--------|

<sup>a</sup>% population in the patient's zip code without a high school degree.

| <b>eTable 4. Factors Associated With Overall Survival (Complete Table)</b> |                      |        |                   |        |
|----------------------------------------------------------------------------|----------------------|--------|-------------------|--------|
|                                                                            | <b>Multivariable</b> |        | <b>IPTW</b>       |        |
|                                                                            | OR [95% CI]          | p      | HR [95% CI]       | p      |
| <b>Adjuvant Endocrine Tx</b>                                               |                      |        |                   |        |
| None                                                                       | -                    | -      | -                 | -      |
| Yes                                                                        | 0.72 [0.65, 0.79]    | <0.001 | 0.70 [0.63, 0.77] | <0.001 |
| <b>Age (years)</b>                                                         |                      |        |                   |        |
| ≤49                                                                        | -                    | -      |                   |        |
| 50-69                                                                      | 1.37 [1.09, 1.73]    | 0.007  |                   |        |
| ≥70                                                                        | 2.77 [2.17, 3.53]    | <0.001 |                   |        |
| <b>Race</b>                                                                |                      |        |                   |        |
| Non-Hispanic White                                                         | -                    | -      |                   |        |
| Non-Hispanic Black                                                         | 1.09 [0.94, 1.26]    | 0.27   |                   |        |
| Hispanic                                                                   | 0.52 [0.37, 0.74]    | <0.001 |                   |        |
| Other                                                                      | 0.66 [0.49, 0.88]    | 0.005  |                   |        |
| <b>Facility Location</b>                                                   |                      |        |                   |        |
| East                                                                       | -                    | -      |                   |        |
| South                                                                      | 0.80 [0.70, 0.90]    | <0.001 |                   |        |
| Central                                                                    | 0.92 [0.81, 1.05]    | 0.22   |                   |        |
| West                                                                       | 0.85 [0.73, 0.98]    | 0.031  |                   |        |
| Unknown                                                                    | 1.13 [0.70, 1.81]    | 0.62   |                   |        |
| <b>Facility type</b>                                                       |                      |        |                   |        |
| Community                                                                  | -                    | -      |                   |        |
| Academic                                                                   | 0.81 [0.73, 0.91]    | <0.001 |                   |        |
| Unknown                                                                    | omitted              | -      |                   |        |
| <b>Insurance status</b>                                                    |                      |        |                   |        |
| Commercial Insurance                                                       | -                    | -      |                   |        |
| Medicare                                                                   | 1.42 [1.25, 1.60]    | <0.001 |                   |        |
| Medicaid                                                                   | 1.59 [1.21, 2.10]    | 0.001  |                   |        |
| Uninsured                                                                  | 1.53 [1.07, 2.18]    | 0.019  |                   |        |
| Other Government/Unknown                                                   | 1.55 [1.15, 2.09]    | 0.004  |                   |        |
| <b>Charlson/Deyo Comorbidity Score</b>                                     |                      |        |                   |        |
| 0                                                                          | -                    | -      |                   |        |
| 1                                                                          | 1.46 [1.31, 1.63]    | <0.001 |                   |        |
| 2                                                                          | 2.46 [2.13, 2.85]    | <0.001 |                   |        |
| <b>Lymph node Status</b>                                                   |                      |        |                   |        |
| Negative                                                                   | -                    | -      |                   |        |
| Positive                                                                   | 1.43 [1.26, 1.62]    | <0.001 |                   |        |

|                                |                   |        |  |  |
|--------------------------------|-------------------|--------|--|--|
| Unknown                        | 2.01 [1.61, 2.51] | <0.001 |  |  |
| <b>Pathologic Stage</b>        |                   |        |  |  |
| Stage I                        | -                 | -      |  |  |
| Stage II                       | 1.07 [0.90, 1.27] | 0.43   |  |  |
| Stage III                      | 1.88 [1.52, 2.34] | <0.001 |  |  |
| <b>Grade</b>                   |                   |        |  |  |
| 1                              | -                 | -      |  |  |
| 2                              | 1.26 [1.09, 1.47] | 0.002  |  |  |
| 3                              | 1.60 [1.36, 1.87] | <0.001 |  |  |
| Unknown                        | 1.12 [0.84, 1.49] | 0.43   |  |  |
| <b>Tumor Size</b>              |                   |        |  |  |
| ≤2cm                           | -                 | -      |  |  |
| 2.1-5cm                        | 1.50 [1.31, 1.71] | <0.001 |  |  |
| >5cm                           | 1.68 [1.32, 2.13] | <0.001 |  |  |
| Unknown                        | 1.31 [0.74, 2.34] | 0.36   |  |  |
| <b>Receipt of Radiotherapy</b> |                   |        |  |  |
| No                             | -                 | -      |  |  |
| Yes                            | 0.79 [0.71, 0.88] | <0.001 |  |  |
| <b>Receipt of Chemotherapy</b> |                   |        |  |  |
| No                             | -                 | -      |  |  |
| Yes                            | 0.63 [0.57, 0.71] | <0.001 |  |  |

Abbreviations: *IPW*: Inverse probability of treatment weighting; *HR*: Hazard ratio.

<sup>a</sup>Only statistically significant factors are displayed.

<sup>b</sup>IPW hazard ratio for the primary outcome of interest alone is provided.
